1  
2  
3  
4  
5  
6  
7  
8  
9  
10  
11  
12  
13  
14  
15  
16  
17  
18  
19  
20  
21  
22  
23  
24  
25  
26  
27  
28  
29

**Retinoic acid rewires the adrenergic core regulatory circuitry of childhood neuroblastoma**

Mark W. Zimmerman<sup>1\*</sup>, Adam D. Durbin<sup>1,2</sup>, Shuning He<sup>1</sup>, Felix Oppel<sup>1</sup>, Hui Shi<sup>1,3</sup>, Ting Tao<sup>1,4,5</sup>,  
Zhaodong Li<sup>1</sup>, Alla Berezovskaya<sup>1</sup>, Yu Liu<sup>6</sup>, Jinghui Zhang<sup>6</sup>, Richard A. Young<sup>7,8</sup>, Brian J. Abraham<sup>6\*</sup>, A.  
Thomas Look<sup>1\*</sup>

**Affiliations**

- <sup>1</sup> Department of Pediatric Oncology, Dana-Farber Cancer Institute, Boston, MA, 02215
- <sup>2</sup> Division of Molecular Oncology, Department of Oncology, St. Jude Children's Research Hospital, Memphis, TN 38105
- <sup>3</sup> College of Animal Sciences, Zhejiang University, Hangzhou, Zhejiang 310052, China
- <sup>4</sup> National Clinical Research Center for Child Health, National Children's Regional Medical Center, Children's Hospital, Zhejiang University School of Medicine, Hangzhou, Zhejiang 310052, China.
- <sup>5</sup> Cancer Center, Zhejiang University, Hangzhou, Zhejiang 310058, China.
- <sup>6</sup> Department of Computational Biology, St. Jude Children's Research Hospital, Memphis, TN 38105
- <sup>7</sup> Whitehead Institute, Cambridge, MA, 02142
- <sup>8</sup> Department of Biology, Massachusetts Institute of Technology, Cambridge, MA, 02142

\*Email: markw\_zimmerman@dfci.harvard.edu (M.W.Z.), brian.abraham@stjude.org (B.J.A.) and thomas\_look@dfci.harvard.edu (A.T.L.)

Short title: Retinoic acid rewires the neuroblastoma CRC

Keywords: neuroblastoma, transcription, cell state, enhancer hijacking

30 **Abstract**

31

32 Neuroblastoma cell identity depends on a core regulatory circuit (CRC) of transcription factors that  
33 collaborate with *MYCN* to drive the oncogenic gene expression program. For neuroblastomas dependent  
34 on the adrenergic CRC, treatment with retinoids can inhibit cell growth and induce differentiation. Here  
35 we show that when *MYCN*-amplified neuroblastomas cells are treated with retinoic acid, histone H3K27  
36 acetylation and methylation become redistributed to decommission super-enhancers driving the  
37 expression of *PHOX2B* and *GATA3*, together with the activation of new super-enhancers that drive high  
38 levels of *MEIS1* and *SOX4* expression. These findings indicate that treatment with retinoids can  
39 reprogram the enhancer landscape, resulting in downregulation of *MYCN* expression, while establishing a  
40 new retino-sympathetic CRC that causes proliferative arrest and sympathetic differentiation. Thus, we  
41 provide mechanisms that account for the beneficial effects of retinoids in high-risk neuroblastoma and  
42 explain the rapid downregulation of expression of *MYCN* despite massive levels of amplification of this  
43 gene.

44

## 45 **Introduction**

46

47 Cell identity is established by transcriptional core regulatory circuits (CRCs) composed of  
48 specific transcription factors that are driven by super-enhancers and form interconnected autoregulatory  
49 loops that coordinately regulate gene expression to establish cell state (1, 2). Throughout development,  
50 cell multipotency and differentiation are controlled by gene expression programs that are hierarchically  
51 regulated by CRCs and their extended regulatory network (3–5). Lineage specification of the embryonic  
52 neural crest, in particular, is governed by a dynamic architecture of master transcription factors and  
53 regulatory networks that give rise to diverse cell lineages during development (6).

54 Pediatric neuroblastoma, a neural-crest-derived tumor of the peripheral sympathetic nervous  
55 system (7), arises most often in the adrenal medulla, where sympathetic progenitor cells can become  
56 transformed by aberrant expression of *MYCN* or *MYC* and fail to differentiate into mature sympathetic  
57 ganglia or neuroendocrine chromaffin cells (8–11). Neuroblastomas in patients and experimental cell  
58 lines generally possess one of two CRC modules – the immature neural crest-like or mesenchymal  
59 subtype, defined by high expression levels of the *PRRX1*, *YAP/TAZ* and *AP-1* transcription factor genes,  
60 or the more commonly observed adrenergic CRC, characterized by high expression levels of *HAND2*,  
61 *ISL1*, *PHOX2B*, *GATA3*, *TBX2*, and *ASCL1* (12–14). Current models suggest that the neural crest-derived  
62 progenitors normally give rise to committed progenitors with the adrenergic cell state, culminating in  
63 terminally differentiated sympathetic neuronal cells and chromaffin neuroendocrine cells of the peripheral  
64 sympathetic nervous system (15, 16). In neuroblastomas with *MYCN* amplification, this oncogene  
65 stabilizes the adrenergic CRC to drive the expression of its transcriptional regulatory network and enforce  
66 an immature neuroblast cell state, while suppressing developmental signals that would normally induce  
67 differentiation or senescence (17). However, *MYCN* overexpression also results in a vulnerability called  
68 transcriptional addiction and creates tumor-selective gene dependencies, which include the adrenergic  
69 CRC transcription factors that sustain high levels of *MYCN* gene expression (18, 19).

70 Retinoic acid-based therapeutics provide a clinical benefit for patients with neuroblastoma and  
71 other malignancies through their ability to suppress tumor growth and promote cell differentiation (20–  
72 24). Adrenergic neuroblastoma cell lines treated with retinoids frequently exhibit phenotypes associated  
73 with neuronal differentiation (25, 26). Hence, we hypothesized that pharmacologically induced  
74 differentiation of neuroblastoma cells with retinoids depends on reprogramming of the adrenergic CRC,  
75 leading to rapid downregulation of *MYCN* expression, even in the context of massive *MYCN* gene  
76 amplification. Using a combination of transcriptional and chromatin assays, we examined the regulation  
77 of adrenergic CRC transcription factors in response to retinoic acid treatment and show that this  
78 autoregulatory loop is reprogrammed into a “retino-sympathetic” CRC, resulting in rapid downregulation  
79 of *MYCN* expression coupled with the induction of cell differentiation and proliferative arrest.

## 80 **Results**

81

### 82 ***Retinoic acid treatment inhibits tumor growth in MYCN transgenic zebrafish***

83 High-risk neuroblastoma patients receive 13-*cis* retinoic acid (13-*cis* RA, or isotretinoin) as a  
84 maintenance therapy following high-dose chemotherapy with autologous stem cell transplantation, but the  
85 mechanistic basis for the efficacy of retinoid treatment is not well understood (7). Using a faithful  
86 zebrafish model of *MYCN*-driven neuroblastoma (*dbh:MYCN*) (9), we tested the ability of isotretinoin to  
87 inhibit neuroblastoma tumor initiation and progression *in vivo*. Three-week-old transgenic zebrafish  
88 exhibiting green, GFP-fluorescent cell masses in the interrenal gland (analogous to the human adrenal  
89 medulla), were treated with DMSO or 2  $\mu$ M 13-*cis* RA (Fig. 1a). Relative to the DMSO control group,  
90 zebrafish receiving isotretinoin had a median 70% reduction in adrenal size after 6 days of treatment (Fig.  
91 1b,c).

92 Next, *dbh:MYCN* transgenic zebrafish (12 wpf) were treated with DMSO or 5  $\mu$ M 13-*cis* RA for  
93 6 days. Similar to the treatment effect observed in juvenile zebrafish, mature zebrafish exhibited a 55%  
94 reduction in tumor burden (Fig. 1d,e). Histological analysis of DMSO and 13-*cis* RA treated tumor cells  
95 showed that the reduced tumor size was associated with loss of cell proliferation, as shown by a loss of  
96 PCNA staining (Fig. 1f,g, S1a,b). Additionally, the transcript levels of *raraa* and *rarab*, the two zebrafish  
97 orthologs of human *RARA*, were increased 3- to 5-fold in 13-*cis* RA treated tumors (Fig. S1c), which is  
98 similar to the effect of retinoic acid treatment on *RARA* expression in BE2C human neuroblastoma cells  
99 (Fig. S1d).

100

### 101 ***ATRA treatment collapses the adrenergic CRC of MYCN-amplified neuroblastoma***

102 To test the effects of retinoids on human *MYCN*-amplified neuroblastoma cells, we treated two  
103 *MYCN* gene amplified neuroblastoma cell lines (BE2C and NGP) with all-*trans* retinoic acid (ATRA), an  
104 active metabolite of isotretinoin, for 6 days and then examined its effects on cell growth and viability.  
105 BE2C and NGP cell growth was significantly suppressed by 6 days of 5  $\mu$ M ATRA treatment relative to  
106 DMSO-treated control cells (Fig. 2a). Treatment with ATRA induced strong phenotypic changes in these  
107 cells, which included neurite outgrowth and upregulation of the structural proteins encoded by fibronectin  
108 (FN1),  $\beta$ 3-tubulin (TUBB3) and vimentin (VIM) (Fig. 2b). These findings are consistent with previous  
109 studies reporting the ability of retinoids to induce differentiation in *MYCN*-transformed neuroblastoma  
110 cells (27, 28).

111 Cell state and fate specification depend on precisely controlled gene expression programs, which  
112 are often under the control of autoregulatory loops involving groups of key transcription factors, called  
113 the core regulatory circuitry or CRC (2). Thus, we investigated whether ATRA treatment affected the  
114 expression levels of members of the *MYCN*-driven adrenergic CRC and its extended regulatory network,  
115 which program the malignant cell state in most *MYCN*-amplified neuroblastoma cells (19). Using an  
116 ERCC spike-in normalized RNA-seq approach comparing cells after 6 days of treatment with either

117 DMSO or ATRA, we observed dramatic changes in gene expression in ATRA-treated BE2C and NGP  
118 cells, with substantial downregulation of a subset of transcripts, including *MYCN*, *GATA3* and *PHOX2B*  
119 (Fig. 3a). Focusing on members of the adrenergic gene set described by Van Groningen *et al.* and Boeva  
120 *et al.* (12, 13), we noted downregulated expression of a subset adrenergic CRC transcription factors,  
121 including the members highly expressed in BE2C and NGP cells, several of which are tumor-selective  
122 gene dependencies (Fig. 3b) (19).

123 Some of the adrenergic transcription factors maintained high levels of expression despite a  
124 collapse of the adrenergic CRC (shown at the bottom of the bar graph in Fig 3b). This was unexpected  
125 because within a feed-forward autoregulatory loop, each transcription factor depends upon each of the  
126 others for its high levels of expression. We will demonstrate in the next section that this apparent paradox  
127 is explained because *TBX2*, *HAND2* and *ISL1* are retained as part of a new ATRA-driven CRC, called the  
128 retino-sympathetic CRC that forms as the adrenergic CRC collapses in ATRA-treated cells. Because CRC  
129 transcription factors bind coordinately within super-enhancers regulating down-stream genes within their  
130 extended regulatory networks, we examined genes regulated by ATRA- associated new super-enhancers  
131 that formed throughout the genome during ATRA treatment. We performed ChIP-seq for H3K27ac and  
132 H3K27me3 in *MYCN*-amplified neuroblastoma cells treated with DMSO or ATRA for 12 days and  
133 examined changes in the *cis*-regulatory regions associated with highly expressed genes. CRC  
134 transcription factors are associated with long stretches of H3K27ac-enriched chromatin, termed super-  
135 enhancers, that are capable of driving high levels of gene expression at their target promoters (2, 29). The  
136 *GATA3* and *PHOX2B* genes, which both showed reduced transcript levels after treatment with ATRA,  
137 lost H3K27ac enrichment in their associated enhancer regions and gained H3K27me3 modifications at  
138 their promoters, which are histone modification patterns associated with chromatin silencing (Fig. 3c,d)  
139 (30). Thus, ATRA-mediated differentiation of neuroblasts coincides with decreased expression of key  
140 CRC adrenergic transcription factors with corresponding changes in histone marks leading to repression  
141 of transcription.

142

### 143 ***ATRA induces formation of a new CRC resulting in neuroblastoma cell differentiation***

144 By contrast to the loss of H3K27ac associated with genes such as *GATA3* and *PHOX2B*, we also  
145 found that ATRA treatment induced enhancer signal increases, including the activation of super-  
146 enhancers associated with several retinoid-responsive genes (Fig. 4a,b, Fig. S2a,b). This enrichment  
147 occurred at discrete locations throughout the genome, and frequently resulted in the formation of new  
148 super-enhancers associated with several known retinoid-responsive genes, such as *CRABP2* and  
149 *EXOC6B*, whose expression was also increased following ATRA-treatment (Fig. S2c,d,e). Several  
150 transcription factor genes – including *SOX4* and *MEIS1* – acquired new super-enhancers as reflected by  
151 increased levels of H3K27ac modification in distal regulatory regions following ATRA treatment in both  
152 BE2C and NGP cells (Fig. 4c,d). This reflects the emergence of a new CRC induced by ATRA treatment  
153 that includes different transcription factors than untreated cells.

154 To test the hypothesis that ATRA treatment induces a new CRC that replaces the adrenergic  
155 CRC, we examined the genes encoding transcription factors that are upregulated concomitantly with the  
156 activation of nearby super-enhancers that form after the start of ATRA treatment (Fig. 5a). We identified  
157 several genes encoding transcription factors that were highly expressed and associated with super-  
158 enhancers in BE2C and NGP cells that were treated with ATRA (Table S1). Because suitable antibodies  
159 are available for GATA3, PHOX2B, MEIS1 and SOX4, we performed CUT&RUN sequencing for  
160 enriched binding of these transcription factors in BE2C cells treated with DMSO or ATRA for 12 days.  
161 Comparing the enrichment of each of these transcription factors at the *HAND2* locus, which was highly  
162 acetylated under both treatment conditions, we note a shift from binding by GATA3 and PHOX2B in  
163 DMSO-treated cells, to predominant occupancy by MEIS1 and SOX4 within the same super-enhancer  
164 region in ATRA-treated cells (Fig. 5b,c). Additionally, comparing ChIP-seq results for binding by the  
165 RARA receptor, we show that RARA co-occupied enhancers with MEIS1 and SOX4 in ATRA-treated  
166 cells (Fig. 5c, Fig. S3). Similar binding patterns were observed genome-wide, where GATA3 and  
167 PHOX2B occupied super-enhancers in DMSO-treated cells, while MEIS1, SOX4 and RARA occupied  
168 super-enhancers in ATRA-treated cells (Fig. 5d).

169 Treatment with ATRA has been reported to downregulate the expression of *MYCN* and induce  
170 cell cycle arrest with either differentiation or apoptosis in *MYCN*-amplified neuroblastoma cells (27). Our  
171 results indicate that the collective activity of the adrenergic CRC, including *HAND2*, *ISL1*, *PHOX2B*,  
172 *GATA3*, *ASCL1*, and *TBX2*, is essential for maintaining the high oncogenic expression level of *MYCN*,  
173 likely through activation of enhancers associated with the *MYCN* gene that are included in the amplified  
174 sequences (31, 32). Loss of *GATA3*, *PHOX2B* and *ASCL1* expression causes the adrenergic CRC to  
175 collapse after ATRA treatment, as noted in previous sections, accompanied by formation of the new  
176 retino-sympathetic CRC. Our results further indicate that the retino-*f*sympathetic CRC, which includes  
177 the transcription factors *RARA*, *SOX4* and *MEIS1*, as well as the shared members – *HAND2*, *ISL1* and  
178 *TBX2* – is not capable of activating native *MYCN* enhancers included within its amplicon, so *MYCN*  
179 levels are rapidly down-regulated despite the high levels of amplification of the gene (Fig. 5e, Fig. S4).  
180 *MYCN* is known to be a strong dependency factor in neuroblastomas with amplified *MYCN* (19, 33),  
181 accounting for the fact that neuroblastoma cells either undergo apoptosis or stop proliferating and undergo  
182 changes in gene expression consistent with terminal differentiation whenever the adrenergic CRC is  
183 dismantled and *MYCN* levels fall.

184 The transition from the adrenergic to the retino-sympathetic CRC in these cells required the  
185 continued presence of 5  $\mu$ M ATRA to drive transcription through RAR/RXR. When ATRA was removed  
186 from the cells (washout), the retino-sympathetic CRC was lost, *MEIS1* and *SOX4* levels fell over 6 days,  
187 and reverted to baseline by 12 days after ATRA removal (Fig. S5). Concurrently the adrenergic CRC  
188 reformed and *MYCN*, *PHOX2B* and *GATA3* levels returned to baseline over the 12 days after ATRA  
189 removal. The rapid reversal of cell state back to adrenergic after removing ATRA indicates that the  
190 neuronal differentiation during ATRA treatment is due to the regulatory activities of retino-sympathetic

191 CRC transcription factors that induce changes in gene expression and epigenetic reprogramming, such as  
192 enhancer-activity modulation, rather than more permanent clonal alterations such as heritable DNA  
193 methylation.

194

### 195 ***SOX4 and MEIS1 co-occupy their own and each other's ATRA-driven super-enhancers***

196 In addition to the ATRA-induced upregulation of expression and *de novo* formation of super-  
197 enhancers at *MEIS1* and *SOX4*, both of the encoded transcription factors co-occupy their own and each  
198 other's super-enhancers, indicating an auto-regulatory expression loop (Fig. 6a,b). *MEIS1* and *SOX4* only  
199 lowly occupied their own and each other's super-enhancers in the control condition, which reflects the  
200 low basal expression levels of each transcription factor prior to ATRA treatment. To assess mutual co-  
201 regulation between *MEIS1* and *SOX4* upon ATRA treatment, we disrupted the endogenous *SOX4* gene  
202 using the CRISPR-Cas9 system. A time course experiment during 5  $\mu$ M ATRA-treatment showed  
203 increased protein levels of *SOX4* at 1, 2 and 3 days after treatment in control cells transduced with Cas9  
204 and a non-targeting sgRNA (Fig. 6c). By contrast, the *SOX4* protein was not detectable in BE2C cells  
205 transduced with Cas9 and a sgRNA targeting the *SOX4* coding region (*SOX4*<sup>-/-</sup>) at any point before or  
206 during ATRA treatment. Next, *MEIS1* gene expression was assayed at each time point in control and  
207 *SOX4*<sup>-/-</sup> cells by quantitative RT-PCR. Unlike control cells, in which *MEIS1* expression increased by 3.5-  
208 fold during ATRA treatment, *SOX4*<sup>-/-</sup> cells did not appreciably upregulate their expression level of *MEIS1*  
209 (Fig. 6d). Further, cells lacking *SOX4* had lower expression levels of the differentiation-associated gene  
210 *FNI* during treatment with ATRA (Fig. 6e). Together, these results show that, as an integral member of  
211 the retino-sympathetic CRC, *SOX4* is essential for increased expression of the other retino-sympathetic  
212 CRC genes, as well as for downstream regulation of genes necessary for differentiation.

213

### 214 ***Progressive waves of autoregulation establish the neuroblast differentiation program***

215 Gene expression levels for the adrenergic neuroblastoma CRC members – *MYCN*, *HAND2*, *ISL1*,  
216 *PHOX2B*, *GATA3*, *ASCL1* and *TBX2* – were assayed by quantitative RT-PCR at 1, 3 and 6 days after  
217 treatment with 5  $\mu$ M ATRA. *TBX2* steadily increases in expression levels, which is consistent with its  
218 joint membership in both the adrenergic and the new retino-sympathetic CRC (Fig. 7a,b). By contrast,  
219 the adrenergic CRC transcription factors that are not part of the retino-sympathetic CRC – *MYCN*,  
220 *GATA3*, *ASCL1* and *PHOX2B* – were quickly downregulated and expression levels stayed low during  
221 ATRA treatment (Fig. 7a). Two other adrenergic transcription factors, which are shared with the retino-  
222 sympathetic CRC – *HAND2* and *ISL1* – fell about 30-40 percent and then expression levels remained  
223 stable or slowly increased during 6 days of continuous treatment. By contrast, genes that do not belong to  
224 the adrenergic CRC and acquire new super-enhancers as they join the retino-sympathetic CRC induced by  
225 ATRA – *RARA*, *MEIS1*, *SOX4* – have steadily rising expression levels during ATRA treatment (Fig. 7b).  
226 Western blotting demonstrated that changes in expression levels for each of these transcription factors  
227 were concordant at the RNA and the protein levels obtained by Western blotting (Fig. 7c).

228

### 229 ***ATRA resistance due to enhancer hijacking by the MYCN or MYC oncogenes***

230 Previous studies have shown that downregulation of *MYCN* is a critical early event that is  
231 necessary to facilitate neuroblastoma cell differentiation in cells treated with ATRA (33). To demonstrate  
232 this effect experimentally, we transduced BE2C cells with an expression vector encoding *MYCN* or empty  
233 vector control. Western blotting demonstrated that this approach was able to enforce high levels of  
234 *MYCN* protein expression that was sustained in these cells despite suppression of endogenous *MYCN*  
235 during treatment with ATRA (Fig. S6a). To assess the induction of differentiation by ATRA, we  
236 examined expression of the retino-sympathetic target gene *FNI* by quantitative RT-PCR, a gene known to  
237 be expressed in ATRA-differentiated cells (34). We found that the expression of this gene was  
238 upregulated by ATRA in control cells, but that cells with sustained high levels of *MYCN* expression were  
239 unable to adopt the retino-sympathetic CRC and did not show increased *FNI* expression (Fig. S6b).

240 A subset of neuroblastoma cell lines that express high levels of *MYC* or *MYCN* do not respond to  
241 treatment with retinoids (35–37). One example is NBL-S, which expresses high levels of *MYCN* but does  
242 not have a high *MYCN* copy number. Instead, this cell line harbors a *t*(2:4) chromosomal translocation,  
243 which repositions the super-enhancer formerly associated with *HAND2* in close genomic proximity to  
244 *MYCN* on one allele – a phenomenon known as enhancer hijacking (Fig. 8a, Fig. S7). Similarly, the high  
245 *MYC*-expressing cell line SKNAS harbors a *t*(4:8) rearrangement, which repositions the *HAND2* super-  
246 enhancer to drive high levels of expression of the *MYC* gene (11). Expression of *HAND2* was not  
247 abolished in NBL-S by treatment with ATRA, and its associated super-enhancer remained stable when  
248 assayed by ChIP-seq (Fig. 8a). This outcome is consistent with the results in *MYCN*-amplified BE2C and  
249 NGP cells, where ATRA treatment had minimal effects on the stability of the super-enhancer regulating  
250 *HAND2* (see Fig. S4).

251 In BE2C and NGP cells, the *MYCN* protein level was almost completely depleted by 6 days of  
252 treatment with ATRA; however, NBL-S cells treated with ATRA showed sustained levels of *MYCN*  
253 protein at both 3 and 6 days (Fig. 8b). Thus, because the retino-sympathetic CRC binds and activates the  
254 *HAND2* super-enhancer, *MYCN* is still expressed at high levels in ATRA-treated NBL-S cells. These  
255 cells are blocked from differentiating and continue to proliferate as neuroblasts despite ATRA-induced  
256 activation of DNA binding by the RARA transcription factor. Several members of the retino-sympathetic  
257 CRC showed elevated transcript levels after ATRA treatment of these cells, but differentiation did not  
258 proceed because of sustained high levels of *MYCN* expression driven by the *HAND2* enhancer (Fig. S7).  
259 BE2C and NGP cells exhibited 72% and 63% reductions, respectively, in cell numbers when assayed 6  
260 days after treatment with DMSO or ATRA (Fig. 8c). No significant difference in cell numbers was  
261 observed in DMSO and ATRA-treated NBL-S and SKNAS cells. Cell cycle phase distributions of  
262 propidium iodide-stained cells were analyzed by DNA flow cytometry before and after treatment with  
263 ATRA. By contrast to BE2C and NGP cells, which became blocked in G1 phase, NBL-S and SKNAS  
264 cells treated with ATRA continued to enter S phase and progress through the cell cycle, consistent with



265 the continued cell proliferation by these *MYCN*- or *MYC*-hijacked neuroblastoma cell lines (Fig. 8d).  
266 Finally, we showed that depletion of the *MYC* protein in SKNAS with CRISPR-Cas9 was sufficient to  
267 sensitize these cells to treatment with ATRA and led to upregulation of retino-sympathetic target genes  
268 including *FNI* (Fig. S8). These results suggest that treatment strategies capable of attenuating *MYC*  
269 signaling could potentially be used in combination with ATRA to facilitate reprogramming.

270

## 271 Discussion

272

273 13-*cis* retinoic acid is a clinically important component of current treatment protocols for  
274 pediatric neuroblastoma and has been shown to inhibit cell growth and induce differentiation when tested  
275 *in vitro* using many different neuroblastoma cell lines (25, 28, 38–40). We sought to explain why ATRA,  
276 the active metabolite of 13-*cis* retinoic acid, exerts these effects in neuroblastoma. Here we show that  
277 ATRA is capable of reprogramming the cell state of neuroblastoma, by fundamentally altering the core  
278 regulatory transcription factors that initiate and maintain the adrenergic gene expression program required  
279 for the tumorigenicity of these cells (12, 13, 19).

280 The adrenergic CRC consists of an interdependent autoregulatory network that includes *HAND2*,  
281 *ISL1*, *PHOX2B*, *GATA3*, *ASCL1* and *TBX2*, and is essential to drive the expression of *MYCN* and to  
282 facilitate the growth and survival of *MYCN*-amplified neuroblastoma cells (14, 19). Treating *MYCN*-  
283 amplified neuroblastoma cells with ATRA resulted in rapid downregulation of *MYCN* expression, loss of  
284 H3K27ac chromatin modifications associated with active super-enhancers within the *PHOX2B* and  
285 *GATA3* gene loci, and the acquisition of H3K27me3 chromatin silencing modifications of the promoters  
286 of these genes, which together lead to decreased expression levels of members of the adrenergic CRC.  
287 Despite the massively increased copy number of *MYCN* in these cells, *MYCN* expression levels were  
288 extremely sensitive to ATRA-treatment and became profoundly downregulated following collapse of the  
289 adrenergic CRC required to drive its expression. Thus, one effect of ATRA treatment is collapse of the  
290 adrenergic CRC due to direct or indirect repression of the *MYCN*, *GATA3*, *PHOX2B* and *ASCL1* genes.  
291 Although the transcript levels of these genes were dramatically reduced during the first day of ATRA-  
292 treatment, the *MYCN*, *GATA3* and *PHOX2B* protein levels did not fall completely until up to 2 days  
293 later. This indicates that while the effects of ATRA on CRC gene RNA expression are immediate,  
294 transition to the new cell state requires additional time due to the delay in transcription factor protein  
295 turnover and new protein synthesis that is required for reprogramming of the transcriptome.

296 Our results demonstrate that the *HAND2*, *ISL1* and *TBX2* super-enhancers, along with high  
297 expression levels of their encoded mRNAs, were maintained after ATRA-mediated differentiation.  
298 Concomitantly, new super-enhancers were established at *MEIS1* and *SOX4*, which coincided with  
299 increased expression levels of these genes. Thus, ATRA initiates a change in cell state of neuroblastoma  
300 cells corresponding to a shift from the adrenergic CRC to a new retino-sympathetic CRC, which includes  
301 the *RARA*, *HAND2*, *ISL1*, *TBX2*, *TBX3*, *MEIS1* and *SOX4* (Fig. 7 and Table S1). The genes of the

302 retino-sympathetic CRC establish an extended regulatory network to enforce the differentiation of  
303 neuroblasts into mature sympathetic neuronal cells.

304 During ATRA-treatment, the mRNA levels for adrenergic CRC transcription factor genes that are  
305 not also components of the retino-sympathetic CRC – *MYCN*, *PHOX2B*, *GATA3*, and *ASCL1* – fell  
306 precipitously by day one, fell a little further by day 3, and then increased slightly by day 6 (Fig 7a).  
307 However, the corresponding protein levels decreased more slowly over the 6-day treatment period (Fig.  
308 7c). Super-enhancers form nuclear condensates driven by the high concentration of transcription factors,  
309 co-factors and RNAs within a confined three-dimensional space in the nucleus (29, 41). It is possible that  
310 the changes in transcription during ATRA treatment are accompanied by a loss of CRC-mediated  
311 protection from ubiquitination such that these transcription factor proteins have reduced stability unless  
312 they are incorporated into a new CRC, as we observed for *HAND2* and *TBX2*, which are retained in the  
313 retino-sympathetic CRC. Experiments to measure the protein half-lives of these classes of transcription  
314 factors during ATRA treatment would resolve this issue in the future.

315 Retinoids are vitamin A derivatives that have an essential function in vertebrate development by  
316 regulating gene expression programs, including a major role in specification of the nervous system (42,  
317 43). Both isotretinoin and ATRA are capable of binding to RAR receptors (44, 45), including RARA,  
318 which is driven by a super-enhancer during ATRA treatment and is highly expressed as a functional  
319 member of the retino-sympathetic CRC. Upon treatment, ATRA binds to RARA, which binds to RXR,  
320 and the complexes bind to retinoid response elements coordinately with other members of the retino-  
321 sympathetic CRC to activate the expression of genes associated with neuroblastoma differentiation (46).  
322 Our findings indicate that ATRA-bound RARA acts as a potent activator and becomes an integral  
323 component of the retino-sympathetic CRC. Thus, the differentiation of neuroblastoma cells treated with  
324 ATRA likely reflects transcriptional reprogramming that occurs during normal PSNS development in  
325 response to endogenous retinoids during the maturation of migratory neuroblasts into non-proliferative  
326 sympathetic neurons and chromaffin cells (43).

327 Collapse of the adrenergic CRC mediated by ATRA includes marked downregulated expression  
328 of the amplified *MYCN* oncogene, whose expression must be reduced prior to neuroblast differentiation  
329 (39). This is achieved in neuroblastomas with *MYCN* gene amplification because endogenous *cis*-  
330 regulatory elements included in the *MYCN* amplicon are selectively activated by the adrenergic CRC (31,  
331 32). This likely explains the physiologic expression of *MYCN* observed in non-transformed adrenergic  
332 neuroblasts that serve as the cell of origin for this form of neuroblastoma, and is supported by the theory  
333 that genomic amplification events require active gene expression in order to be selected for in  
334 tumorigenesis (47).

335 *MYCN* gene amplification is the most recurrent form of activation of a *MYC* family gene in  
336 neuroblastoma, but it is not the only mechanism. Neuroblastoma tumors can also upregulate the  
337 expression of *MYC* or *MYCN* by chromosomal structural rearrangements that hijack super-enhancers  
338 regulating the expression of *HAND2* (11), which is an important transcription factor in both the

339 adrenergic and retino-sympathetic CRCs. Because *HAND2* is a member of both CRCs, the super-  
340 enhancer regulating it is active in both cell states. In neuroblasts with enhancer-hijacking, the super-  
341 enhancer on the intact allele drives *HAND2* expression while the *HAND2* super-enhancer on the  
342 translocated allele continues to drive expression of *MYC* or *MYCN* as the retino-sympathetic CRC is  
343 attempting to form during ATRA treatment. Therefore, *MYCN* expression in these cells is not ablated by  
344 ATRA activating the retino-sympathetic CRC, preventing *MYCN* downregulation, which is essential for  
345 cell cycle arrest and differentiation (28). Thus, high levels of expression of either *MYC* or *MYCN* due to  
346 translocations hijacking next to the *HAND2* super-enhancer produce neuroblastoma cells that are resistant  
347 to the effects of ATRA in inducing neuroblastoma cell differentiation. Examples of this resistance  
348 phenotype include the cell lines NBL-S, with a t(2;4) activating expression of *MYCN*, and SKNAS, with a  
349 t(4;8) activating expression of *MYC*. In both cases, ATRA-treated cells retain high levels of *MYCN* or  
350 *MYC* oncogene expression at the RNA and protein levels and are blocked from undergoing  
351 differentiation. These findings highlight a resistance mechanism that could explain why some patients  
352 may not benefit and relapse, despite treatment of minimal residual disease with retinoids. Thus, our  
353 studies of transcriptional control of cell state in neuroblastoma not only provide insight into the role of  
354 ATRA in the treatment of high-risk neuroblastoma, but also reveal mechanisms that impart resistance to  
355 retinoids in some children with this disease.  
356

## 357 **Materials and Methods**

358

### 359 ***Cell lines and proliferation assays***

360 BE2C, SKNAS and 293T cells were purchased from ATCC; NGP and NBL-S cells were purchased from  
361 DSMZ. All neuroblastoma cell lines were cultured at 5% CO<sub>2</sub> in RPMI media containing 10% FBS and  
362 1% Penicillin-Streptomycin. Cells were routinely tested (every 3 months) for mycoplasma contamination  
363 and genotyped (every 12 months) by STR analysis at the Dana-Farber Molecular Diagnostic Core  
364 Facility. Cell proliferation was measured by plating 5000 cells per well in white 96-well plates in 100  $\mu$ L  
365 of total media containing DMSO or 5  $\mu$ M ATRA. Cell viability at each time point was assayed with Cell  
366 Titer glo (Promega) according to the manufacturer's protocol.

367

### 368 ***Lentiviral CRISPR-Cas9 mutagenesis***

369 Stable Cas9:sgRNA expressing cell lines were created using lentivirus produced in 293T cells. Briefly,  
370 sgRNA target sequences (Table S2) were cloned in the lentiCRISPRv2 vector (Addgene plasmid #52963)  
371 as previously reported (PMID:25075903). Plasmids were transfected using Fugene HD (Promega) along  
372 with pMD2.G (Addgene Plasmid#12259) and psPAX2 (Addgene plasmid #12260) to generate viral  
373 particles. Following lentiviral transduction, cells were selected with puromycin and expanded prior to  
374 evaluation.

375

### 376 ***Compounds and reagents***

377 Isotretinoin (13-*cis* retinoic acid) and ATRA (all-*trans* retinoic acid) were purchased from Selleckchem.  
378 Cell culture grade DMSO was purchased from ATCC. Compounds were resuspended in DMSO to a stock  
379 concentration of 100 mM and added directly to cell culture media or zebrafish water at the indicated  
380 concentrations.

381

### 382 ***Zebrafish tumorigenesis assays***

383 Transgenic zebrafish were developed as previously reported (9). All animal experiments were conducted  
384 at Dana-Farber Cancer Institute in accordance with animal care and use committee protocol #02-107.  
385 Wildtype and transgenic zebrafish were maintained under standard aquaculture conditions at the Dana-  
386 Farber Cancer Institute. Transgenic *dbh:MYCN* zebrafish were crossed to a stable *dbh:EGFP* expressing  
387 line and sorted for EGFP+ fluorescence. EGFP+ zebrafish 3 and 12 weeks-post fertilization (wpf) were  
388 treated with DMSO or 13-*cis* RA (2  $\mu$ M for 3 wpf, and 5  $\mu$ M for 12 wpf) added directly to the  
389 aquaculture water and refreshed daily. Zebrafish were imaged at day 0 prior to treatment and again  
390 following 6 days of exposure to either compound. Prior to imaging zebrafish were anesthetized with  
391 tricaine and subsequently monitored for neuroblastoma tumor progression. All comparative experimental  
392 groups for sympathoadrenal and neuroblastoma tissue quantification were imaged under the same

393 conditions, and acquired fluorescent images were quantified using ImageJ software (NIH) by measuring  
394 the area of EGFP fluorescence. Overlays were created using ImageJ and Adobe Photoshop 7.0.1.

395

### 396 ***Immunohistochemistry***

397 Zebrafish for histological analysis were euthanized with tricaine, fixed in 4% paraformaldehyde at 4°C  
398 overnight and decalcified with 0.25 M EDTA (pH 8.0). Paraffin sectioning followed by hematoxylin and  
399 eosin (H&E) staining or IHC was performed at the Dana-Farber/Harvard Cancer Center Research  
400 Pathology Core. Primary antibody (PCNA, EMD Millipore, MAB424R, 1:100) binding was detected with  
401 the diaminobenzidine-peroxidase visualization system (EnVision+, Dako). Mayer's hematoxylin was  
402 used for counterstaining. Slides were imaged using the Echo Revolve4 inverted microscopy system.

403

### 404 ***Immunofluorescence and confocal microscopy***

405 Cell were grown and compound treated on glass slides in 6-well cell culture plates. After 6 days of  
406 treatment with DMSO or ATRA, slides were incubated with a primary antibody at 4°C overnight (Table  
407 S3), washed with PBST, and then incubated with a secondary antibody for 2 hours at room temperature.  
408 Secondary antibodies were conjugated with Alexa Fluor 488 (Life Technologies). Alexa Fluor 568  
409 Phalloidin (Life Technologies) and DAPI (BD Biosciences) were used for counter staining. Fluorescent  
410 images were taken with a Leica SP5X scanning confocal microscope at the Confocal and Light  
411 Microscopy core facility at Dana-Farber Cancer Institute.

412

### 413 ***Western blotting***

414 Protein samples were collected and lysed using RIPA buffer containing protease and phosphatase  
415 inhibitors (Cell Signaling Technology). Lysates were quantified by Bradford assay (Bio-rad), and 10 µg  
416 of extracted protein was separated using Novex SDS-PAGE reagents and transferred to nitrocellulose  
417 membranes (Life Technologies). Membranes were blocked in 5% milk protein and incubated with  
418 primary antibodies (Table S3) overnight followed by secondary HRP-linked goat anti-rabbit and anti-  
419 mouse (Cell Signaling) antibodies (1:1000) according to the manufacturers' instructions. Antibody bound  
420 membranes were incubated with SuperSignal West Pico chemiluminescent substrate (Thermo-Fisher) and  
421 developed using HyBlot CL autoradiography film (Thomas Scientific). The antibodies used  
422 immunoblotting are listed in Table S3.

423

### 424 ***Quantitative RT-PCR***

425 Total RNA was harvested using the RNeasy kit (QIAGEN) according to the manufacturer's protocol. First-  
426 strand synthesis was performed with Superscript III (Invitrogen). Quantitative PCR analysis was  
427 conducted on the ViiA7 system (Life Technologies) with SYBR Green PCR Master Mix (Roche) using  
428 validated primers specific to each target each gene. Primer sequences are displayed in Supplementary  
429 Table S2.

430

### 431 *Spike-in normalized RNA-seq*

432 DMSO and ATRA treated cells were grown in triplicate using 6-well plates and collected directly into  
433 Trizol. ERCC spike-in RNA was diluted 1:10 in nuclease-free water and added directly to Trizol lysates  
434 after being normalized to cell number as per the manufacturer's protocol (Life Technologies). Libraries  
435 were prepared using Illumina TruSeq stranded specific sample preparation kits from 500ng of purified  
436 total RNA according to the manufacturer's protocol. The finished dsDNA libraries were quantified by  
437 Qubit fluorometer (Thermo-Fisher), TapeStation 4200 (Agilent), and RT-qPCR using the Kapa  
438 Biosystems library quantification kit (Roche) according to manufacturer's protocols. Indexed libraries  
439 were pooled in equimolar ratios and sequenced on an Illumina NextSeq 550 with single-end 75bp reads  
440 by the Dana-Farber Cancer Institute Molecular Biology Core Facilities. Reads were aligned to a reference  
441 genome containing the non-random chromosomes from hg19 and the sequences of ERCC probes using  
442 hisat2 with parameters --no-novel-juncs and -G set to a gene database file downloaded from RefSeq on  
443 7/5/2017 to which positions of the ERCC probes were added. Coverage of the genes in this list was  
444 calculated using htseq-count with parameters -i gene\_id --stranded=reverse -f bam -m intersection-strict.  
445 Violin plots were created using Prism 8.4.3 (GraphPad). Raw and processed data files were deposited to  
446 the NCBI GEO server under super-series GSE155002 (Table S4).

447

### 448 *CUT&RUN sequencing and initial processing*

449 CUT&RUN coupled with high-throughput DNA sequencing was performed using antibodies listed in  
450 Table S3 and Cutana pA/G-MNase (Epiccypher) according to the manufacturer's protocol. Briefly, cells  
451 were washed and incubated with activated Concanavalin A beads for 10 min at room temperature. Cells  
452 were then resuspended in antibody buffer containing 0.01% digitonin, 1 mL of each antibody (Table S3)  
453 was added to individual cell aliquots and tubes were rotated at 4°C overnight. The following day, targeted  
454 chromatin digestion and release was performed with 2.5 mL Cutana pA/G-MNase and 100mM CaCl<sub>2</sub>.  
455 Retrieved genomic DNA was purified with the MinElute PCR purification kit and eluted in 10 mL of  
456 buffer EB. Sequencing libraries were prepared with the automated Swift 2S system, followed by 100bp-  
457 PE sequencing with Novaseq 6000.

458 Reads were aligned to the human reference genome (hg19) using bowtie v1.2.2 in single-end  
459 mode with parameters -k 2 -m 2 -best and -l set to the read length. For visualization, WIG files were  
460 created from aligned read positions using MACS v1.4 with parameters -w -S -space=50 -nomodel -  
461 shiftsize=200 to artificially extend reads to be 200bp and to calculate their density in 50bp bins. Read  
462 counts in 50bp bins were then normalized to the millions of mapped reads, giving reads per million (rpm)  
463 values. WIG files were visualized in the IGV browser version 2.7.2. Raw and processed data files were  
464 deposited to the NCBI GEO server under super-series GSE155002 (Table S4).

465

### 466 *ChIP-seq and initial processing*

467 Chromatin Immunoprecipitation coupled with high-throughput DNA sequencing (ChIP-seq) was  
468 performed as previously described (19). The antibodies used for each experiment are listed in Table S3.  
469 For each ChIP, 5 µg of antibody coupled to 2 µg of magnetic Dynabeads (Life Technologies) were added  
470 to 3 mL of sonicated nuclear extract from formaldehyde fixed cells. Chromatin was immunoprecipitated  
471 overnight, crosslinks were reversed, and DNA was purified by precipitation with  
472 phenol:chloroform:isoamyl alcohol. DNA pellets were resuspended in 25 µL of TE buffer. Illumina  
473 sequencing, library construction and ChIP-seq analysis methods were previously described.

474 Reads were aligned to the human reference genome (hg19) using bowtie v1.2.2 with parameters –  
475 k 2 –m 2 –best and –l set to the read length. For visualization, WIG files were created from aligned read  
476 positions using MACS v1.4 with parameters –w –S –space=50 –nomodel –shiftsize=200 to artificially  
477 extend reads to be 200bp and to calculate their density in 50bp bins. Read counts in 50bp bins were then  
478 normalized to the millions of mapped reads, giving reads per million (rpm) values. WIG files were  
479 visualized in the IGV browser version 2.7.2. Raw and processed data files were deposited to the NCBI  
480 GEO server under super-series GSE155002 (Table S4).

481

#### 482 ***Super-enhancer Identification and Assignment***

483 Super-enhancers in BE2C and NGP cells were separately identified using ROSE  
484 ([https://bitbucket.org/young\\_computation/rose](https://bitbucket.org/young_computation/rose)). Briefly, two sets of peaks of H3K27ac were identified  
485 using MACS with parameter sets –keep-dup=auto –p 1e-9 and –keep-dup=all –p 1e-9. Peaks identified  
486 that contact the region chr2:14817188-17228298 were discarded because they fall within the amplified  
487 genomic regions around MYCN. The collapsed union of regions called using both MACS parameter sets  
488 that do not contact the discarded MYCN-proximal region were used as input for ROSE with parameters -s  
489 12500 -t 1000 -g hg19. Enhancers were assigned to the single expressed gene, which was defined as being  
490 in the top 2/3 of promoter (TSS +/- 500bp) H3K27ac coverage in a sample, whose transcription start site  
491 was nearest the center of the enhancer.

492

#### 493 ***Differential coverage analysis***

494 ATRA-induced changes in H3K27ac coverage were assessed at the collapsed union of super-enhancers  
495 identified separately by ROSE in each of four samples (NGP/BE2C, DMSO/ATRA). Coverage in each  
496 region was assessed using bedtools intersect and normalized by dividing each value by the millions of  
497 mapped reads per sample. Collapsed super-enhancers were assigned to the nearest gene considered  
498 expressed in any of the four samples, where expression was defined as being in the top 2/3 of promoter  
499 (TSS +/-500bp) H3K27ac coverage.

500

#### 501 ***Cell cycle analysis***

502 Cells were treated with DMSO or ATRA for 6 days in triplicate, and 500,000 cells per sample were  
503 collected and lysed in cold hypotonic propidium iodide (PI) / RNase solution (50 µg/mL PI, 4mM sodium

504 citrate, 30 U/mL RNaseA, 0.1% TX-100). Samples were then vigorously vortexed and incubated at 37°C  
505 for 10 min. Sodium chloride was added to a final concentration of 0.15M, and stained nuclei were stored  
506 at 4°C until analysis was ready to be performed. The samples were then analyzed by flow cytometry (BD  
507 LSRFortessa). Cell cycle distribution was analyzed with the FlowJo cell cycle Watson (Pragmatic) model.  
508 The singlet population was isolated with a live cell gate. To analyze the proportion of cells in G1, S, and  
509 G2/M, the Watson (Pragmatic) model with the G2 peak constrained on  $G1 = G2 \times 2$  was used. Both  
510 debris and doublets were removed from the analysis.

511

### 512 **Statistical analysis**

513 Statistical calculations were performed using Prism 7.01 (GraphPad). Digital images of the fluorescence  
514 signal for transgenic embryos, and the area of the fluorescence coverage, was quantified with ImageJ  
515 (NIH) for Fig. 1. Multivariate ANOVA analysis followed by two-tailed, unpaired t-tests with confidence  
516 intervals of 95% were used for the quantitative assays.

517

### 518 **Supplementary Materials**

519

- 520 Figure S1. Loss of neuroblastoma cell proliferation following treatment with 13-cis retinoic acid.
- 521 Figure S2. Acquisition of new super-enhancers is associated with increased expression of their  
522 associated genes.
- 523 Figure S3. RARA and MEIS1 occupy H3K27ac-enriched super-enhancers associated with *MEIS1*,  
524 *HIC1* and *SOX4* in ATRA-treated neuroblastoma cells.
- 525 Figure S4. Several super-enhancers associated with CRC transcription factors are stable after  
526 treatment with ATRA.
- 527 Figure S5. Reversion to the adrenergic CRC and phenotype following ATRA washout.
- 528 Figure S6. Retained expression of *MYCN* blocks the induction of the ATRA-mediated differentiation  
529 program in neuroblastoma.
- 530 Figure S7. ATRA-mediated changes in gene expression and protein level in *MYCN*-amplified cells  
531 are not observed in cells that activate *MYCN* or *MYC* by enhancer hijacking.
- 532 Figure S8. Disruption of *MYC* activity sensitizes cells to the transcriptional effects of ATRA.
- 533 Table S1. Putative core regulatory transcription factors
- 534 Table S2. Oligo and primer sequences
- 535 Table S3. Antibody information
- 536 Table S4. NCBI GEO accession numbers



537 **Acknowledgments**

538

539 We would like to thank J.R. Gilbert for editorial assistance and critical comments and Z. Herbert of the  
540 Dana-Farber Molecular Biology Core Facility for genomics support. This work was supported by NIH  
541 grants R35CA210064 (A.T.L.), R01CA216391 (J.Z.) and K08CA245251 (A.D.D), and the St. Jude  
542 Children's Research Hospital Collaborative Research Consortium on Chromatin Regulation in Pediatric  
543 Cancer. M.W.Z. was supported by grants from the Alex's Lemonade Stand Foundation, Charles A. King  
544 Trust, and Claudia Adams Barr Foundation. A.D.D. was supported by grants from the Alex's Lemonade  
545 Stand Foundation, CureSearch for Children's Cancer and Damon Runyon-Sohn Foundation. F.O.  
546 acknowledges the German Cancer Aid for their generous funding within the Mildred-Scheel-Postdoctoral  
547 program of the Mildred Scheel Foundation. A.D.D. and B.J.A. are supported by the American Lebanese  
548 Syrian Associated Charities (ALSAC).

549

550 **Author contributions**

551

552 M.W.Z., A.D.D., S.H., R.A.Y., B.J.A. and A.T.L. conceived the project, performed data interpretation  
553 and wrote the manuscript with input from all authors. M.W.Z. and A.D.D. designed and performed ChIP-  
554 seq, RNA-seq and flow cytometry experiments. B.J.A. performed ChIP-seq and RNA-seq computational  
555 analysis. Y.L. and J.Z. analyzed neuroblastoma cell line genomic data. M.W.Z. and S.H. designed and  
556 performed in vivo zebrafish experiments. F.O., H.S. and T.T. performed cellular immunofluorescence  
557 assays and confocal microscopy. A.B. and Z.L. performed western blotting and other experiments.

558

559 **Competing interests**

560

561 B.J.A. is a shareholder in Syros Pharmaceuticals. R.A.Y. is a shareholder in Syros Pharmaceuticals and is  
562 a consultant/advisory board member for the same. A.T.L. is a shareholder in Jengu Therapeutics and is a  
563 consultant/advisory board member for Jengu Therapeutics and Omega Therapeutics. The other authors  
564 declare no competing interests.

565

566 **Data and materials availability**

567

568 All data needed to evaluate the conclusions in the paper are present in the paper and/or the Supplementary  
569 Materials. ChIP-seq and RNA-seq data have been deposited in the NCBI Gene Expression Omnibus  
570 (accession number GSE155002).

## 571 **References**

- 572 1. D. Hnisz, B. J. Abraham, T. I. Lee, A. Lau, V. Saint-André, A. A. Sigova, H. A. Hoke, R. A.  
573 Young, Super-enhancers in the control of cell identity and disease. *Cell*. **155**, 934–947 (2013).
- 574 2. V. Saint-André, A. J. Federation, C. Y. Lin, B. J. Abraham, J. Reddy, T. I. Lee, J. E. Bradner, R. A.  
575 Young, Models of human core transcriptional regulatory circuitries. *Genome Res*. **26**, 385–396  
576 (2016).
- 577 3. D. Arendt, J. M. Musser, C. V. H. Baker, A. Bergman, C. Cepko, D. H. Erwin, M. Pavlicev, G.  
578 Schlosser, S. Widder, M. D. Laubichler, G. P. Wagner, The origin and evolution of cell types. *Nat.*  
579 *Rev. Genet.* **17**, 744–757 (2016).
- 580 4. Y. Kanki, R. Nakaki, T. Shimamura, T. Matsunaga, K. Yamamizu, S. Katayama, J.-I. Suehiro, T.  
581 Osawa, H. Aburatani, T. Kodama, Y. Wada, J. K. Yamashita, T. Minami, Dynamically and  
582 epigenetically coordinated GATA/ETS/SOX transcription factor expression is indispensable for  
583 endothelial cell differentiation. *Nucleic Acids Res*. **45**, 4344–4358 (2017).
- 584 5. M. Huang, Y. Chen, M. Yang, A. Guo, Y. Xu, L. Xu, H. P. Koeffler, dbCoRC: a database of core  
585 transcriptional regulatory circuitries modeled by H3K27ac ChIP-seq signals. *Nucleic Acids Res*. **46**,  
586 D71–D77 (2018).
- 587 6. M. L. Martik, M. E. Bronner, Regulatory Logic Underlying Diversification of the Neural Crest.  
588 *Trends Genet.* **33**, 715–727 (2017).
- 589 7. K. K. Matthay, J. M. Maris, G. Schleiermacher, A. Nakagawara, C. L. Mackall, L. Diller, W. A.  
590 Weiss, Neuroblastoma. *Nat Rev Dis Primers*. **2**, 16078 (2016).
- 591 8. K. Huber, The sympathoadrenal cell lineage: specification, diversification, and new perspectives.  
592 *Dev. Biol.* **298**, 335–343 (2006).
- 593 9. S. Zhu, J.-S. Lee, F. Guo, J. Shin, A. R. Perez-Atayde, J. L. Kutok, S. J. Rodig, D. S. Neuberg, D.  
594 Helman, H. Feng, R. A. Stewart, W. Wang, R. E. George, J. P. Kanki, A. T. Look, Activated ALK  
595 collaborates with MYCN in neuroblastoma pathogenesis. *Cancer Cell*. **21**, 362–373 (2012).
- 596 10. M. A. Morrison, M. W. Zimmerman, A. T. Look, R. A. Stewart, Studying the peripheral  
597 sympathetic nervous system and neuroblastoma in zebrafish. *Methods Cell Biol.* **134**, 97–138  
598 (2016).
- 599 11. M. W. Zimmerman, Y. Liu, S. He, A. D. Durbin, B. J. Abraham, J. Easton, Y. Shao, B. Xu, S. Zhu,  
600 X. Zhang, Z. Li, N. Weichert-Leahey, R. A. Young, J. Zhang, A. T. Look, MYC Drives a Subset of  
601 High-Risk Pediatric Neuroblastomas and Is Activated through Mechanisms Including Enhancer  
602 Hijacking and Focal Enhancer Amplification. *Cancer Discov.* **8**, 320–335 (2018).
- 603 12. V. Boeva, C. Louis-Brennetot, A. Peltier, S. Durand, C. Pierre-Eugène, V. Raynal, H. C. Etchevers,  
604 S. Thomas, A. Lermine, E. Daudigeos-Dubus, B. Geoerger, M. F. Orth, T. G. P. Grünwald, E.  
605 Diaz, B. Ducos, D. Surdez, A. M. Carcaboso, I. Medvedeva, T. Deller, V. Combaret, E. Lapouble,  
606 G. Pierron, S. Grossetête-Lalami, S. Baulande, G. Schleiermacher, E. Barillot, H. Rohrer, O.

- 607 Delattre, I. Janoueix-Lerosey, Heterogeneity of neuroblastoma cell identity defined by  
608 transcriptional circuitries. *Nat. Genet.* **49**, 1408–1413 (2017).
- 609 13. T. van Groningen, J. Koster, L. J. Valentijn, D. A. Zwijnenburg, N. Akogul, N. E. Hasselt, M.  
610 Broekmans, F. Haneveld, N. E. Nowakowska, J. Bras, C. J. M. van Noesel, A. Jongejan, A. H. van  
611 Kampen, L. Koster, F. Baas, L. van Dijk-Kerkhoven, M. Huizer-Smit, M. C. Lecca, A. Chan, A.  
612 Lakeman, P. Molenaar, R. Volckmann, E. M. Westerhout, M. Hamdi, P. G. van Sluis, M. E. Ebus,  
613 J. J. Molenaar, G. A. Tytgat, B. A. Westerman, J. van Nes, R. Versteeg, Neuroblastoma is  
614 composed of two super-enhancer-associated differentiation states. *Nat. Genet.* **49**, 1261–1266  
615 (2017).
- 616 14. L. Wang, T. K. Tan, A. D. Durbin, M. W. Zimmerman, B. J. Abraham, S. H. Tan, P. C. T. Ngoc, N.  
617 Weichert-Leahey, K. Akahane, L. N. Lawton, J. L. Rokita, J. M. Maris, R. A. Young, A. T. Look,  
618 T. Sanda, ASCL1 is a MYCN- and LMO1-dependent member of the adrenergic neuroblastoma core  
619 regulatory circuitry. *Nat Commun.* **10**, 5622 (2019).
- 620 15. R. Soldatov, M. Kaucka, M. E. Kastriiti, J. Petersen, T. Chontorotzea, L. Englmaier, N. Akkuratova,  
621 Y. Yang, M. Häring, V. Dyachuk, C. Bock, M. Farlik, M. L. Piacentino, F. Boismoreau, M. M.  
622 Hilscher, C. Yokota, X. Qian, M. Nilsson, M. E. Bronner, L. Croci, W.-Y. Hsiao, D. A. Guertin, J.-  
623 F. Brunet, G. G. Consalez, P. Ernfors, K. Fried, P. V. Kharchenko, I. Adameyko, Spatiotemporal  
624 structure of cell fate decisions in murine neural crest. *Science.* **364** (2019),  
625 doi:10.1126/science.aas9536.
- 626 16. S. Jansky, A. K. Sharma, V. Körber, A. Quintero, U. H. Toprak, E. M. Wecht, M. Gartlgruber, A.  
627 Greco, E. Chomsky, T. G. P. Grünwald, K.-O. Henrich, A. Tanay, C. Herrmann, T. Höfer, F.  
628 Westermann, Single-cell transcriptomic analyses provide insights into the developmental origins of  
629 neuroblastoma. *Nat Genet* (2021), doi:10.1038/s41588-021-00806-1.
- 630 17. R. Zeid, M. A. Lawlor, E. Poon, J. M. Reyes, M. Fulciniti, M. A. Lopez, T. G. Scott, B. Nabet, M.  
631 A. Erb, G. E. Winter, Z. Jacobson, D. R. Polaski, K. L. Karlin, R. A. Hirsch, N. P. Munshi, T. F.  
632 Westbrook, L. Chesler, C. Y. Lin, J. E. Bradner, Enhancer invasion shapes MYCN-dependent  
633 transcriptional amplification in neuroblastoma. *Nat. Genet.* **50**, 515–523 (2018).
- 634 18. E. Chipumuro, E. Marco, C. L. Christensen, N. Kwiatkowski, T. Zhang, C. M. Hatheway, B. J.  
635 Abraham, B. Sharma, C. Yeung, A. Altabef, A. Perez-Atayde, K.-K. Wong, G.-C. Yuan, N. S.  
636 Gray, R. A. Young, R. E. George, CDK7 inhibition suppresses super-enhancer-linked oncogenic  
637 transcription in MYCN-driven cancer. *Cell.* **159**, 1126–1139 (2014).
- 638 19. A. D. Durbin, M. W. Zimmerman, N. V. Dharia, B. J. Abraham, A. B. Iniguez, N. Weichert-  
639 Leahey, S. He, J. M. Krill-Burger, D. E. Root, F. Vazquez, A. Tsherniak, W. C. Hahn, T. R. Golub,  
640 R. A. Young, A. T. Look, K. Stegmaier, Selective gene dependencies in MYCN-amplified  
641 neuroblastoma include the core transcriptional regulatory circuitry. *Nat. Genet.* **50**, 1240–1246  
642 (2018).

- 643 20. J. G. Villablanca, A. A. Khan, V. I. Avramis, R. C. Seeger, K. K. Matthay, N. K. Ramsay, C. P.  
644 Reynolds, Phase I trial of 13-cis-retinoic acid in children with neuroblastoma following bone  
645 marrow transplantation. *J. Clin. Oncol.* **13**, 894–901 (1995).
- 646 21. C. P. Reynolds, P. F. Schindler, D. M. Jones, J. L. Gentile, R. T. Proffitt, P. A. Einhorn,  
647 Comparison of 13-cis-retinoic acid to trans-retinoic acid using human neuroblastoma cell lines.  
648 *Prog. Clin. Biol. Res.* **385**, 237–244 (1994).
- 649 22. K. K. Matthay, J. G. Villablanca, R. C. Seeger, D. O. Stram, R. E. Harris, N. K. Ramsay, P. Swift,  
650 H. Shimada, C. T. Black, G. M. Brodeur, R. B. Gerbing, C. P. Reynolds, Treatment of high-risk  
651 neuroblastoma with intensive chemotherapy, radiotherapy, autologous bone marrow transplantation,  
652 and 13-cis-retinoic acid. Children’s Cancer Group. *N. Engl. J. Med.* **341**, 1165–1173 (1999).
- 653 23. K. K. Matthay, C. P. Reynolds, R. C. Seeger, H. Shimada, E. S. Adkins, D. Haas-Kogan, R. B.  
654 Gerbing, W. B. London, J. G. Villablanca, Long-term results for children with high-risk  
655 neuroblastoma treated on a randomized trial of myeloablative therapy followed by 13-cis-retinoic  
656 acid: a children’s oncology group study. *J. Clin. Oncol.* **27**, 1007–1013 (2009).
- 657 24. M.-C. Chen, S.-L. Hsu, H. Lin, T.-Y. Yang, Retinoic acid and cancer treatment. *Biomedicine*  
658 (*Taipei*). **4**, 22 (2014).
- 659 25. N. Sidell, A. Altman, M. R. Haussler, R. C. Seeger, Effects of retinoic acid (RA) on the growth and  
660 phenotypic expression of several human neuroblastoma cell lines. *Exp. Cell Res.* **148**, 21–30 (1983).
- 661 26. C. P. Reynolds, K. K. Matthay, J. G. Villablanca, B. J. Maurer, Retinoid therapy of high-risk  
662 neuroblastoma. *Cancer Lett.* **197**, 185–192 (2003).
- 663 27. C. J. Thiele, L. A. Deutsch, M. A. Israel, The expression of multiple proto-oncogenes is  
664 differentially regulated during retinoic acid induced maturation of human neuroblastoma cell lines.  
665 *Oncogene.* **3**, 281–288 (1988).
- 666 28. C. J. Thiele, C. P. Reynolds, M. A. Israel, Decreased expression of N-myc precedes retinoic acid-  
667 induced morphological differentiation of human neuroblastoma. *Nature.* **313**, 404–406 (1985).
- 668 29. W. A. Whyte, D. A. Orlando, D. Hnisz, B. J. Abraham, C. Y. Lin, M. H. Kagey, P. B. Rahl, T. I.  
669 Lee, R. A. Young, Master transcription factors and mediator establish super-enhancers at key cell  
670 identity genes. *Cell.* **153**, 307–319 (2013).
- 671 30. T. Kouzarides, Chromatin modifications and their function. *Cell.* **128**, 693–705 (2007).
- 672 31. A. R. Morton, N. Dogan-Artun, Z. J. Faber, G. MacLeod, C. F. Bartels, M. S. Piazza, K. C. Allan,  
673 S. C. Mack, X. Wang, R. C. Gimple, Q. Wu, B. P. Rubin, S. Shetty, S. Angers, P. B. Dirks, R. C.  
674 Sallari, M. Lupien, J. N. Rich, P. C. Scacheri, Functional Enhancers Shape Extrachromosomal  
675 Oncogene Amplifications. *Cell.* **179**, 1330-1341.e13 (2019).
- 676 32. K. Helmsauer, M. E. Valieva, S. Ali, R. Chamorro González, R. Schöpflin, C. Röefzaad, Y. Bei, H.  
677 Dorado Garcia, E. Rodriguez-Fos, M. Puiggròs, K. Kasack, K. Haase, C. Keskeny, C. Y. Chen, L.  
678 P. Kuschel, P. Euskirchen, V. Heinrich, M. I. Robson, C. Rosswog, J. Toedling, A. Szymansky, F.  
679 Hertwig, M. Fischer, D. Torrents, A. Eggert, J. H. Schulte, S. Mundlos, A. G. Henssen, R. P. Koche,

- 680 Enhancer hijacking determines extrachromosomal circular MYCN amplicon architecture in  
681 neuroblastoma. *Nat Commun.* **11**, 5823 (2020).
- 682 33. U. K. Westermark, M. Wilhelm, A. Frenzel, M. A. Henriksson, The MYCN oncogene and  
683 differentiation in neuroblastoma. *Semin. Cancer Biol.* **21**, 256–266 (2011).
- 684 34. M. Szemes, A. Greenhough, Z. Melegh, S. Malik, A. Yuksel, D. Catchpole, K. Gallacher, M.  
685 Kollareddy, J. H. Park, K. Malik, Wnt Signalling Drives Context-Dependent Differentiation or  
686 Proliferation in Neuroblastoma. *Neoplasia.* **20**, 335–350 (2018).
- 687 35. P. Chlapek, V. Slavikova, P. Mazanek, J. Sterba, R. Veselska, Why Differentiation Therapy  
688 Sometimes Fails: Molecular Mechanisms of Resistance to Retinoids. *Int J Mol Sci.* **19** (2018),  
689 doi:10.3390/ijms19010132.
- 690 36. K. Matsumoto, E. Lucarelli, C. Minniti, C. Gaetano, C. J. Thiele, Signals transduced via insulin-like  
691 growth factor I receptor (IGF(R)) mediate resistance to retinoic acid-induced cell growth arrest in a  
692 human neuroblastoma cell line. *Cell Death Differ.* **1**, 49–58 (1994).
- 693 37. S.-J. Wei, T. H. Nguyen, I.-H. Yang, D. G. Mook, M. R. Makena, D. Verlekar, A. Hindle, G. M.  
694 Martinez, S. Yang, H. Shimada, C. P. Reynolds, M. H. Kang, MYC transcription activation  
695 mediated by OCT4 as a mechanism of resistance to 13-cisRA-mediated differentiation in  
696 neuroblastoma. *Cell Death Dis.* **11**, 368 (2020).
- 697 38. N. Sidell, Retinoic acid-induced growth inhibition and morphologic differentiation of human  
698 neuroblastoma cells in vitro. *J. Natl. Cancer Inst.* **68**, 589–596 (1982).
- 699 39. R. K. Wada, R. C. Seeger, C. P. Reynolds, T. Alloggiamento, J. M. Yamashiro, C. Ruland, A. C.  
700 Black, J. D. Rosenblatt, Cell type-specific expression and negative regulation by retinoic acid of the  
701 human N-myc promoter in neuroblastoma cells. *Oncogene.* **7**, 711–717 (1992).
- 702 40. C. P. Reynolds, D. J. Kane, P. A. Einhorn, K. K. Matthay, V. L. Crouse, J. R. Wilbur, S. B. Shurin,  
703 R. C. Seeger, Response of neuroblastoma to retinoic acid in vitro and in vivo. *Prog. Clin. Biol. Res.*  
704 **366**, 203–211 (1991).
- 705 41. J. E. Henninger, O. Oksuz, K. Shrinivas, I. Sagi, G. LeRoy, M. M. Zheng, J. O. Andrews, A. V.  
706 Zamudio, C. Lazaris, N. M. Hannett, T. I. Lee, P. A. Sharp, I. I. Cissé, A. K. Chakraborty, R. A.  
707 Young, RNA-Mediated Feedback Control of Transcriptional Condensates. *Cell.* **184**, 207-225.e24  
708 (2021).
- 709 42. B. Blumberg, J. Bolado, T. A. Moreno, C. Kintner, R. M. Evans, N. Papalopulu, An essential role  
710 for retinoid signaling in anteroposterior neural patterning. *Development.* **124**, 373–379 (1997).
- 711 43. A. Janesick, S. C. Wu, B. Blumberg, Retinoic acid signaling and neuronal differentiation. *Cell. Mol.*  
712 *Life Sci.* **72**, 1559–1576 (2015).
- 713 44. V. Giguere, E. S. Ong, P. Segui, R. M. Evans, Identification of a receptor for the morphogen  
714 retinoic acid. *Nature.* **330**, 624–629 (1987).
- 715 45. M. Petkovich, N. J. Brand, A. Krust, P. Chambon, A human retinoic acid receptor which belongs to  
716 the family of nuclear receptors. *Nature.* **330**, 444–450 (1987).

- 717 46. A. Carpentier, N. Balitrand, C. Rochette-Egly, B. Shroot, L. Degos, C. Chomienne, Distinct  
718 sensitivity of neuroblastoma cells for retinoid receptor agonists: evidence for functional receptor  
719 heterodimers. *Oncogene*. **15**, 1805–1813 (1997).
- 720 47. A. Furlan, V. Dyachuk, M. E. Kastriti, L. Calvo-Enrique, H. Abdo, S. Hadjab, T. Chontorotzea, N.  
721 Akkuratova, D. Usoskin, D. Kamenev, J. Petersen, K. Sunadome, F. Memic, U. Marklund, K. Fried,  
722 P. Topilko, F. Lallemand, P. V. Kharchenko, P. Ernfors, I. Adameyko, Multipotent peripheral glial  
723 cells generate neuroendocrine cells of the adrenal medulla. *Science*. **357** (2017),  
724 doi:10.1126/science.aal3753.

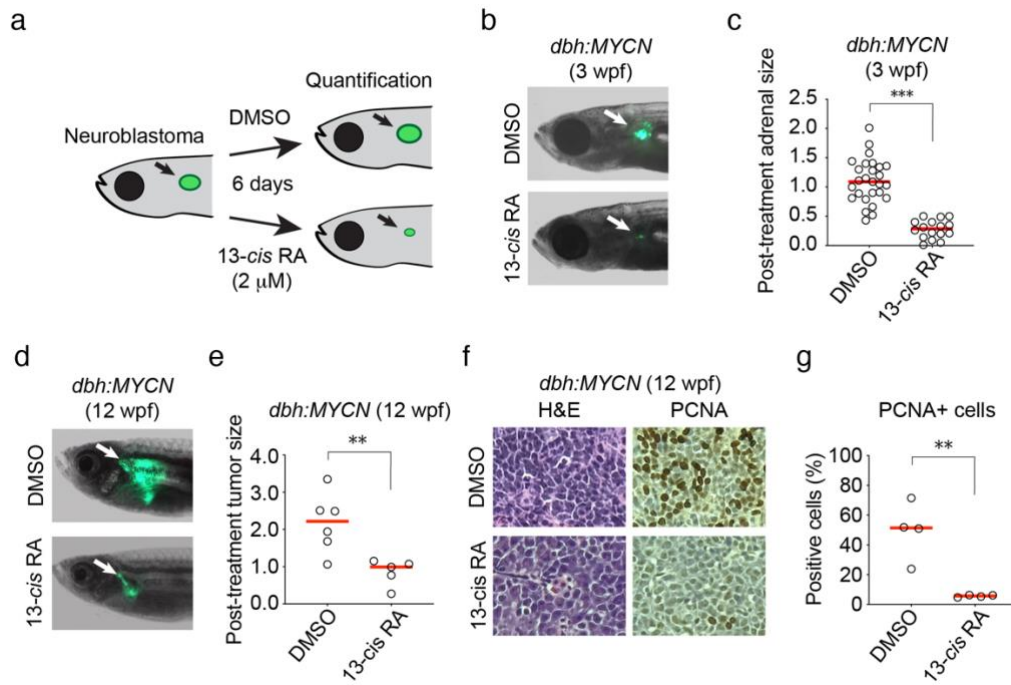

725

726 **Figure 1. Retinoic acid suppresses the growth of transformed neuroblasts *in vivo*.**

727 a) Experimental design of the zebrafish tumor treatment assay. Tumor bearing *dbh:MYCN* transgenic  
728 zebrafish, 3 weeks post-fertilization (wpf), were treated with DMSO or 13-*cis* retinoic acid (2  $\mu$ M) for 6  
729 days. Tumor size was quantified by the EGFP+ surface area. b) Representative images of 3 wpf  
730 *dbh:MYCN* transgenic zebrafish with EGFP+ sympathoadrenal cell hyperplasia (white arrows) that were  
731 treated with DMSO or 2  $\mu$ M 13-*cis* retinoic acid for 6 days. c) Dot plot showing the distribution of post-  
732 treatment tumor size of DMSO (n=26) or 13-*cis* retinoic acid (n=16) treatment in zebrafish, as quantified  
733 by EGFP cross sectional area. Red bar indicates the median value. \*\*\*p<0.001 by T-test. d)  
734 Representative images of 12 week-old *dbh:MYCN* transgenic zebrafish with EGFP+ neuroblastomas  
735 (white arrows) that were treated with DMSO or 5  $\mu$ M 13-*cis* retinoic acid for 6 days. e) Dot plot showing  
736 the distribution of post-treatment tumor size of DMSO (n=6) or 13-*cis* retinoic acid (n=5) treatment in  
737 zebrafish, as quantified by EGFP cross sectional area. Red bar indicates mean. \*\*p<0.01 by T-test. f)  
738 Representative images of 12 wpf neuroblastoma tumor sections treated with DMSO or 5  $\mu$ M 13-*cis*  
739 retinoic acid for 6 days and stained with hematoxylin & eosin (left), or a PCNA detecting antibody  
740 counter stained with hematoxylin (right). g) Dot plot showing the percentage of PCNA+ cells in DMSO  
741 (n=4) or 13-*cis* retinoic acid (n=4) treated neuroblastoma tumors. Red bar indicates mean. \*\*p<0.01 by T-  
742 test.

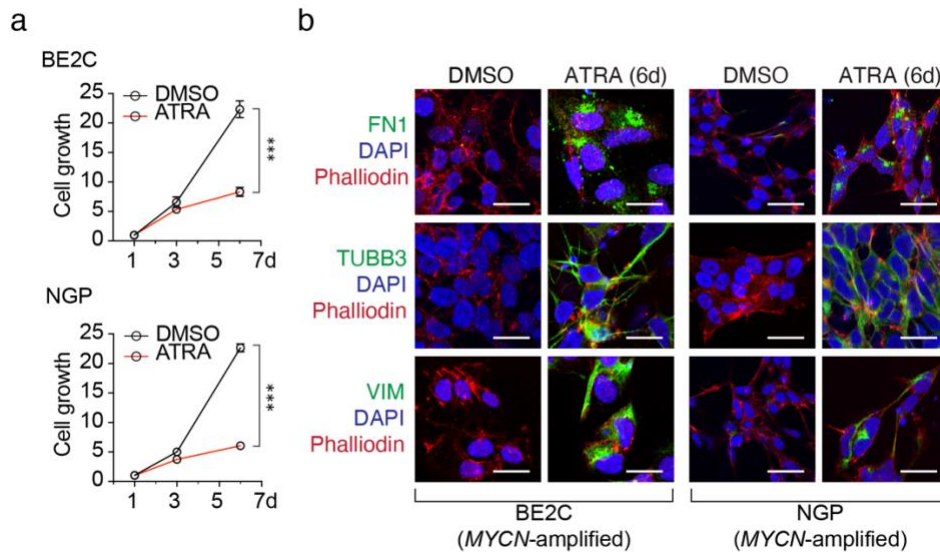

743

744 **Figure 2. ATRA suppresses neuroblastoma cell growth and increases the expression of neuronal**  
745 **differentiation markers.**

746 a) Cell growth time course for BE2C and NGP cells comparing treatment with DMSO or 5  $\mu$ M all-*trans*  
747 retinoic acid (ATRA) for 6 days; \*\*\* $p < 0.001$  by ANOVA and T-test at 6 days. Data shows cell growth  
748 measurements with standard error bars for one representative experiment of three different independent  
749 experimental replicates. b) Confocal images of BE2C and NGP neuroblastoma cells treated with DMSO  
750 or 5  $\mu$ M ATRA for 6 days. Cells were stained with fibronectin (FN1), b3-tubulin (TUBB3) or vimentin  
751 (VIM) (green) and counterstained with DAPI (blue) and phalloidin (red). Scale bar indicates 20  $\mu$ m.



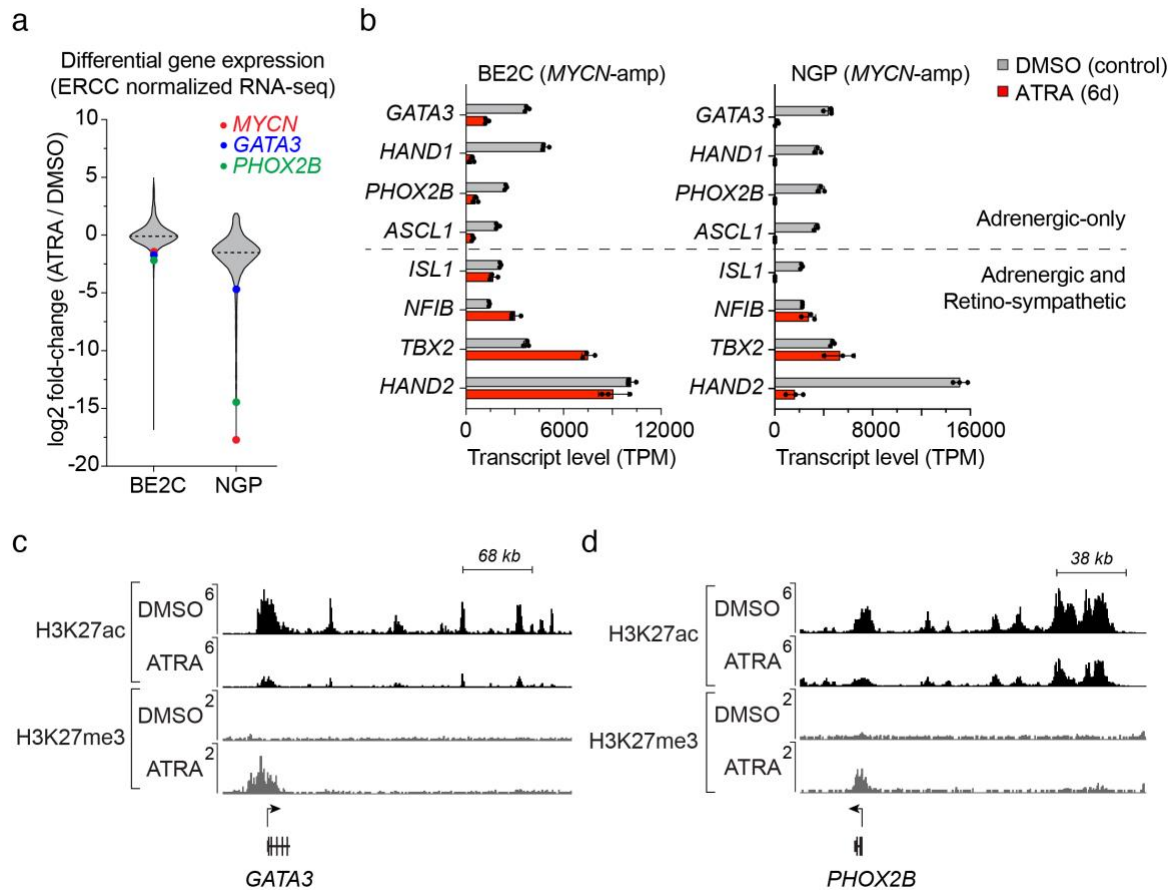

752

753 **Figure 3. Effect of ATRA treatment on the expression and regulation of adrenergic CRC**  
 754 **transcription factors in *MYCN*-amplified neuroblastoma.**

755 a) Violin plot illustrating log<sub>2</sub>-fold changes (ATRA/DMSO) among all highly expressed genes (base  
 756 mean TPM > 10) when assayed by spike-in normalized RNA-seq in BE2C and NGP (*MYCN*-amplified)  
 757 cells. Changes are highlighted for *MYCN* (red), *GATA3* (blue) and *PHOX2B* (green), all of which were  
 758 reduced at the protein level as well. b) Expression levels of adrenergic CRC transcription factor genes  
 759 determined by spike-in normalized mRNA-seq in BE2C and NGP cells treated with DMSO (grey) or 5  
 760 μM ATRA (red) for 6 days. c,d) Normalized ChIP-seq tracks for H3K27ac and H3K27me3 depicting  
 761 super-enhancers associated with the *GATA3* (c) and *PHOX2B* (d) gene loci in BE2C cells. Cells were  
 762 treated with 5 μM ATRA for 12 days. ChIP-seq read densities (y axis) were normalized to reads per  
 763 million reads sequenced from each sample.

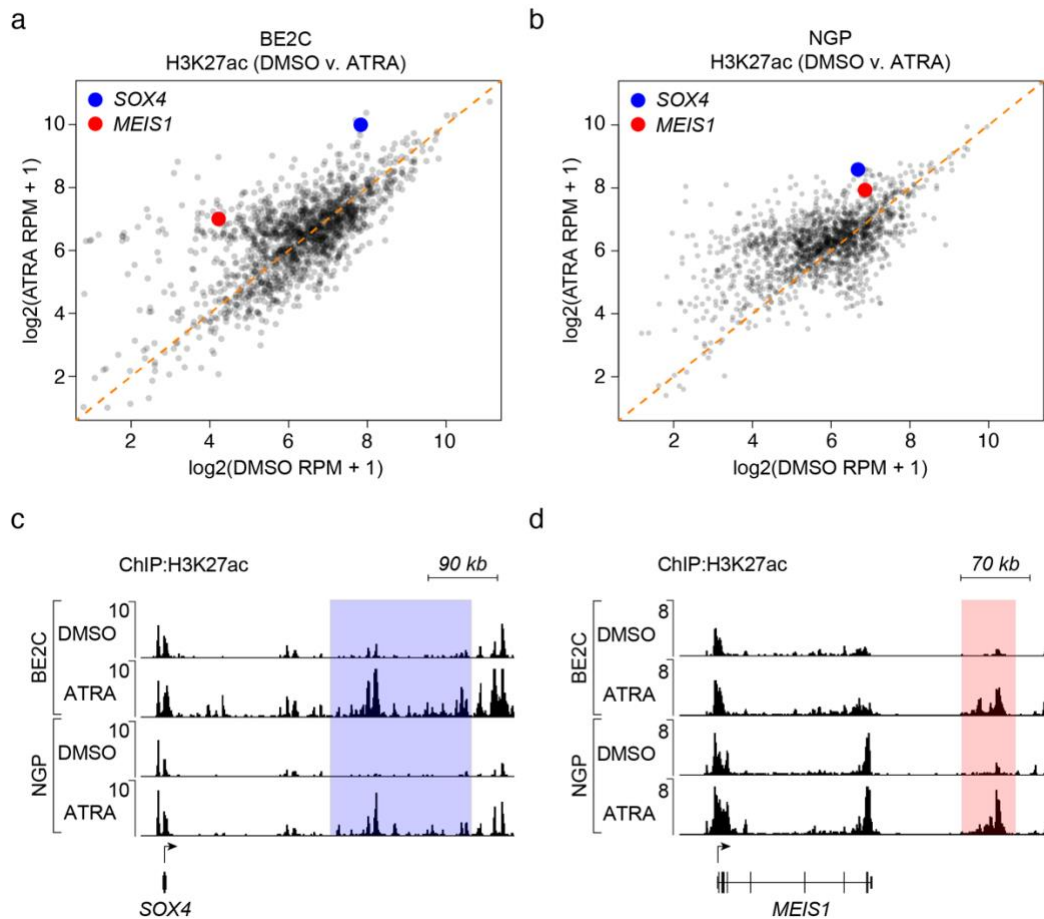

764

765 **Figure 4. Treatment with ATRA redistributes H3K27ac modifications to remodel the enhancer**  
766 **landscape of neuroblastoma cells.**

767 a,b) Super-enhancers were identified in the DMSO and ATRA treated BE2C (a) and NGP (b) cells and  
768 collapsed into one set of regions whose differential enrichment was assessed in a H3K27ac coverage  
769 scatterplot. Orange diagonal line indicates equivalent H3K27ac signal in control DMSO compared to  
770 ATRA-treated cells. Highlighted enhancers were associated with SOX4 (blue) and MEIS1 (red). c,d)  
771 Normalized ChIP-seq tracks for H3K27ac showing acquired super-enhancers associated with SOX4 (c)  
772 and MEIS1 (d) in BE2C and NGP cells. Cells were treated with 5  $\mu\text{M}$  ATRA for 12 days; shaded areas  
773 indicate super-enhancers identified by H3K27ac enrichment in the collapsed union list. ChIP-seq read  
774 densities (y axis) were normalized to reads per million reads sequenced from each sample.

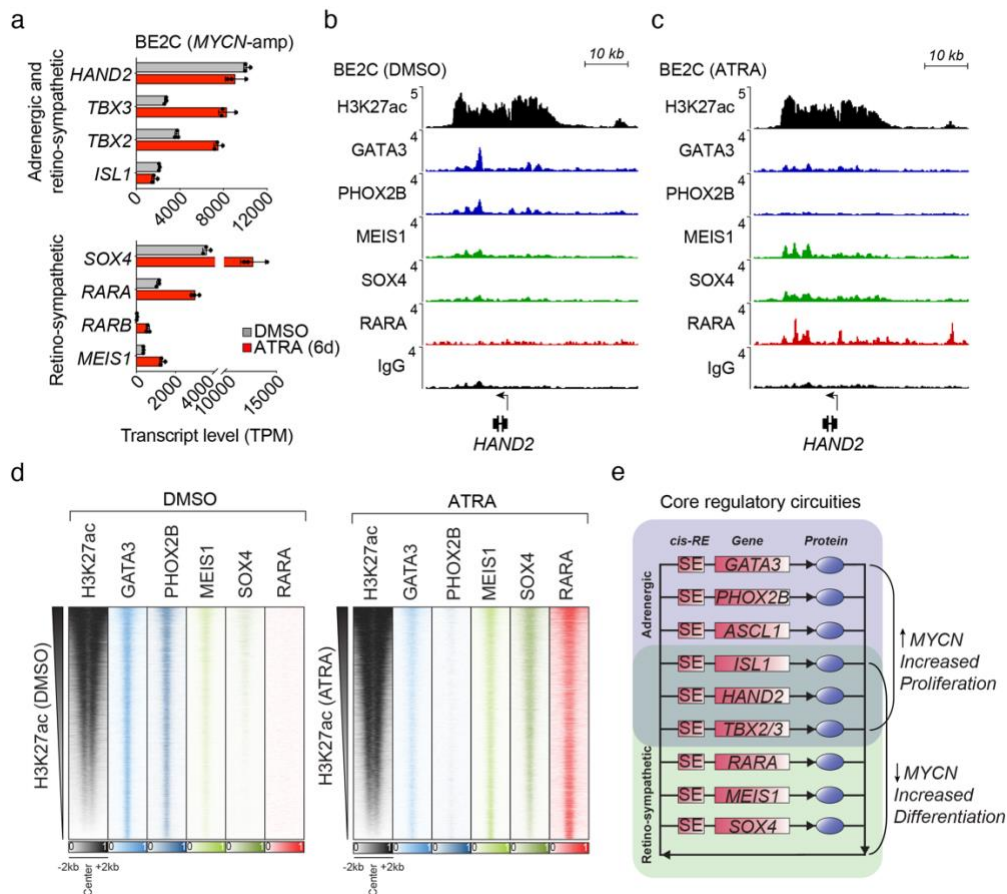

775

776 **Figure 5. Cellular reprogramming by ATRA rewires neuroblastoma CRC favoring retino-**  
 777 **sympathetic TFs.**

778 a) Transcript levels (TPM) of transcription factor genes upregulated in BE2C cells by treatment with  
 779 ATRA (5  $\mu$ M) for 6 days. A subset of transcription factors retained from the adrenergic CRC are shown  
 780 above, and transcription factors unique to the retino-sympathetic CRC are shown below. b,c) Normalized  
 781 ChIP-seq (H3K27ac and RARA) and CUT&RUN-seq (GATA3, PHOX2B, MEIS1 and SOX4) read  
 782 coverage tracks depicting occupancy of transcription factors at the HAND2 gene locus in BE2C cells  
 783 treated with DMSO (b) or ATRA (c) for 12 days. Rabbit IgG is shown as a control for the CUT&RUN-  
 784 seq technique and alignment read densities (y axis) were normalized to reads per million reads sequenced.  
 785 d) Genome-wide co-occupancy heatmap for adrenergic and retino-sympathetic transcription factors in  
 786 DMSO- and ATRA-treated BE2C cells as determined by ChIP-seq (H3K27ac and RARA) and  
 787 CUT&RUN-seq (GATA3, PHOX2B, MEIS1 and SOX4). Genomic regions (rows) were defined as those  
 788 enriched in sequencing reads for at least one target and are ranked by the integrated H3K27ac signal. e)  
 789 CRC transcription factors form an interconnected core regulatory loop, and treatment of adrenergic  
 790 neuroblastoma cells with ATRA suppressed the expression and activity of *GATA3*, *PHOX2B* and *ASCL1*.  
 791 Treatment with ATRA led to increased transcript levels and acquisition of new super-enhancers  
 792 associated with *MEIS1* and *SOX4* in both BE2C and NGP cells. *RARA* had increased expression and were  
 793 associated with super-enhancers under both DMSO and ATRA conditions. Regulatory elements and gene  
 794 loci are denoted by rectangles, and proteins by oval symbols.

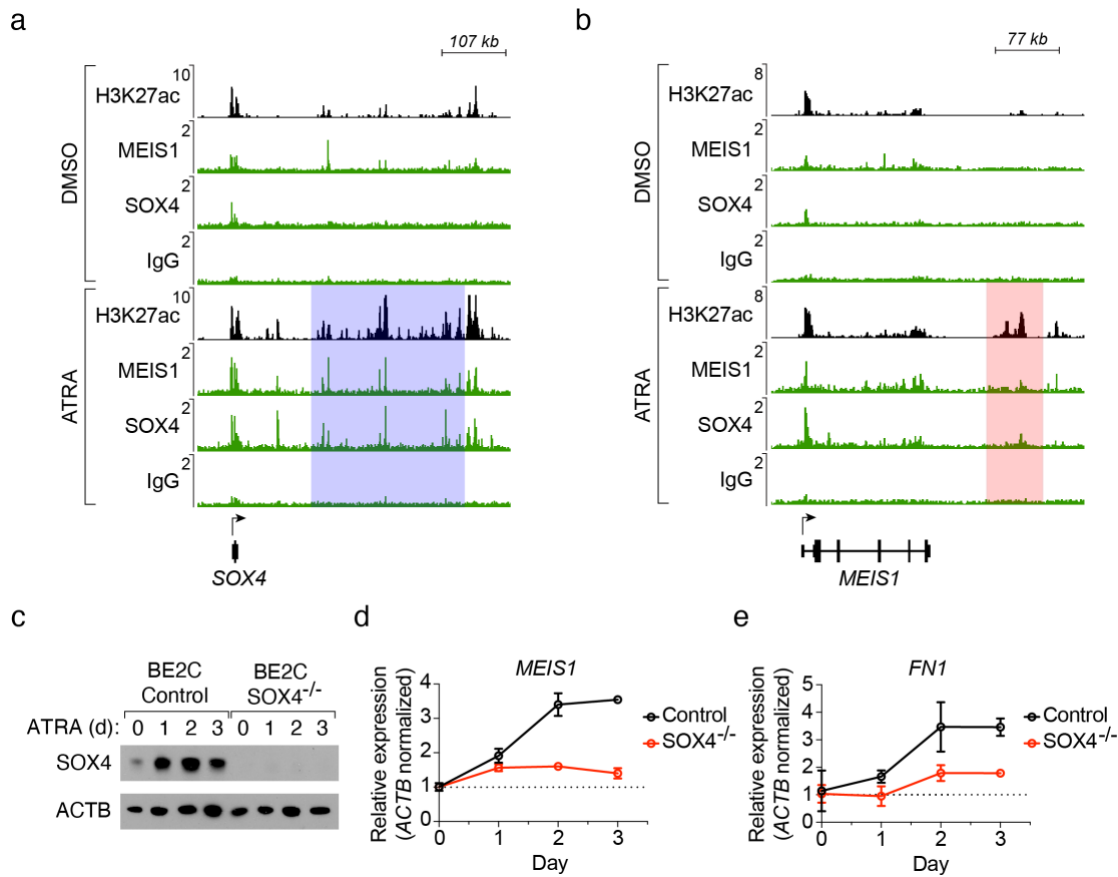

795

796

**Figure 6. Co-regulated expression of *SOX4* and *MEIS1* mediates the shift from the adrenergic to retino-sympathetic gene expression program.**

797

798

a,b) Normalized ChIP-seq (H3K27ac) and CUT&RUN-seq (MEIS1, SOX4 and IgG) alignment tracks depicting occupancy of transcription factors at the *SOX4* (a) and *MEIS1* (b) gene loci in BE2C cells treated with DMSO (above) or ATRA (below) for 12 days. Super-enhancers were identified by H3K27ac signal and are shaded in ATRA-treated cells. Read densities (y axis) were normalized to reads per million sequenced from each sample.

800

801

c) Western blot assay for SOX4 protein levels in wild-type control and *SOX4*-knockout BE2C cells treated with 5  $\mu$ M ATRA for 0, 1, 2 and 3 days. ACTB was used as a loading control.

802

803

d,e) Gene expression assayed by quantitative RT-PCR measuring the RNA levels of *MEIS1* (d)

804

and *FN1* (e) in wildtype and *SOX4*-knockout BE2C cells treated with 5 mM ATRA for 0, 1, 2 and 3 days,

805

and normalized to *ACTB*.

806

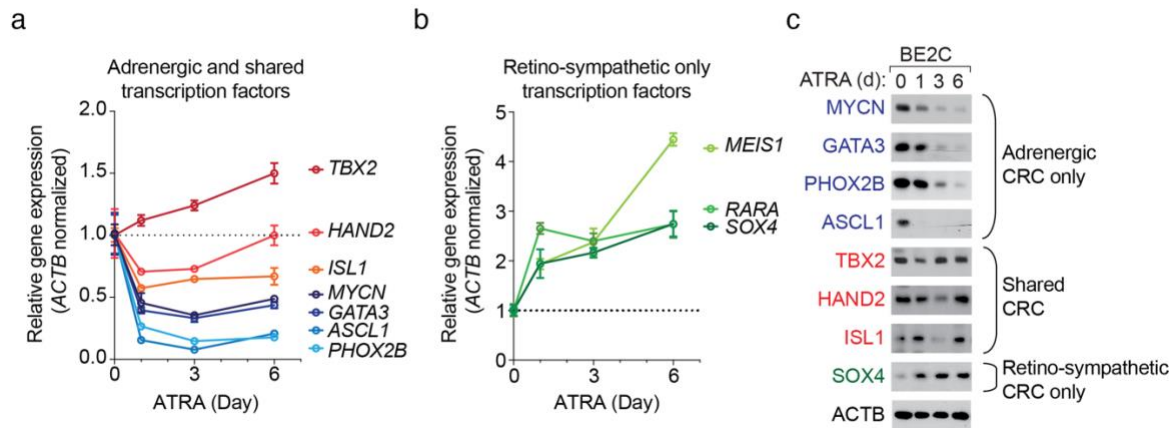

807

808

809

810

811

812

813

814

815

816

**Figure 7. Rapid suppression of the adrenergic CRC and upregulation of the retino-sympathetic CRC when MYCN-amplified neuroblastoma cells are exposed to ATRA.** BE2C cells were treated with 5  $\mu$ M ATRA for 0, 1, 3 and 6 days, assayed by quantitative RT-PCR and normalized to ACTB. a) RNA gene expression levels of transcription factors exclusively in the adrenergic CRC, MYCN, GATA3, PHOX2B, and ASCL1, and those shared by both CRCs, TBX2, HAND2, ISL1. b) RNA gene expression levels of transcription factors exclusively in the retino-sympathetic transcription factors, MEIS1, SOX4 and RARA. c) Western blot assay of protein levels for transcription factor belonging to either CRC in BE2C cells treated with 5  $\mu$ M ATRA for 0, 1, 3 and 6 days. ACTB is shown as a protein loading control.

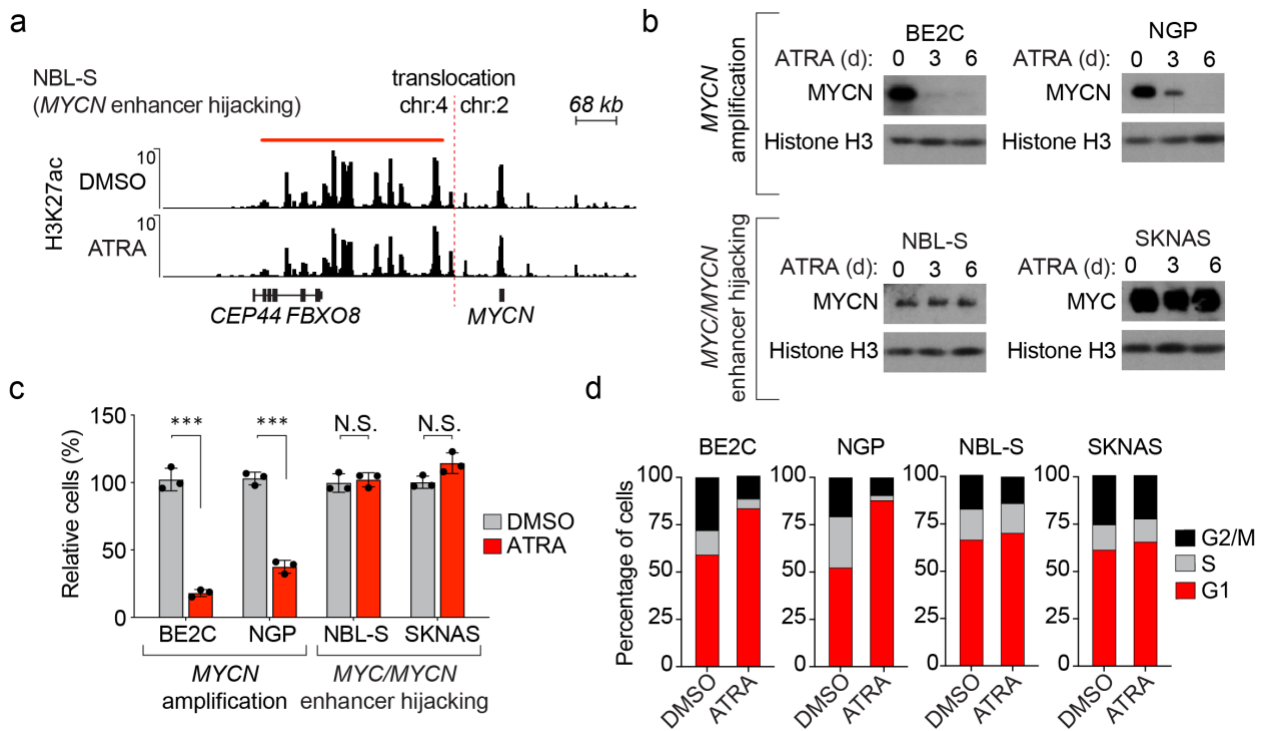

817

818 **Figure 8. Hijacking the *HAND2* super-enhancer subverts ATRA-mediated suppression of *MYCN* or**  
 819 ***MYC* expression.**

820 a) H3K27ac ChIP-seq in NBL-S cells treated with DMSO or ATRA (5  $\mu$ M) for 12 days, showing the  
 821 genomic region surrounding the *t*(2;4) structural variation involving the *MYCN* gene locus. The region  
 822 downstream of *FBXO8* is a super-enhancer that is translocated to within close proximity of the *MYCN*  
 823 gene. b) Western blot assay measuring MYCN or MYC protein levels in BE2C and NGP (*MYCN*-  
 824 amplified), along with NBL-S and SKNAS (enhancer hijacking) cells following treatment with ATRA (5  
 825  $\mu$ M) for 0, 3 and 6 days. c) Cell viability assay following 6 days of treatment with DMSO or ATRA (5  
 826  $\mu$ M) in *MYCN*-amplified (BE2C and NGP) and *MYC/MYCN* enhancer hijacked (NBL-S and SKNAS) cell  
 827 lines. \*\*\* $p < 0.001$  by T-test; not significant (N.S.) d) Bar graphs showing cell cycle distribution  
 828 determined from hypotonic citrate propidium iodide (PI) staining of BE2C, NGP, NBL-S and SKNAS  
 829 cells treated with DMSO or ATRA (5  $\mu$ M) for 6 days.
